# Supplementary material for: Genetic Diversity and Antimicrobial Resistance of Extraintestinal E. coli Populations Pre- and Post-Antimicrobial Therapy on Broilers Affected by Colisepticemia
Source: MDPI journal article supplement (doi:10.3390/ani13162590), 2023-08-11
Supplement: s1 [file s1]

**Table S2 – Metadata of newly sequenced *E. coli* genomes of broiler isolates**

| Farm | Isolate ID | Day of sampling | Origin | O Serogroup | MLST-Type | FimH-Type |
|------|------------|-----------------|--------|-------------|-----------|-----------|
| A    | 871-21     | 1               | spleen | NT          | ST117     | H97       |
|      | 871-22     | 1               | spleen | O2          | ST140     | H15       |
|      | 871-41     | 1               | lung   | NT          | ST117     | H97       |
|      | 871-42     | 1               | lung   | NT          | ST7080    | H54       |
|      | 871-46     | 1               | lung   | NT          | ST1618    | H9        |
|      | 916-43     | 5               | lung   | NT          | ST359     | H35       |
|      | 976-38     | 10              | heart  | NT          | ST43      | NT        |
|      | 976-50     | 10              | lung   | O20         | ST746     | H1429     |
|      | 976-57     | 10              | brain  | NT          | ST117     | H97       |
|      | 1614-21    | 1               | spleen | O78         | ST23      | H35       |
|      | 1614-23    | 1               | spleen | O78         | ST23      | H35       |
|      | 1614-35    | 1               | heart  | O78         | ST23      | H35       |
|      | 1614-41    | 1               | lung   | O78         | ST23      | H35       |
| B    | 1665-22    | 5               | spleen | NT          | ST7080    | H54       |
|      | 1665-24    | 5               | spleen | NT          | ST48      | H23       |
|      | 1665-47    | 5               | lung   | NT          | ST1196    | H31       |
|      | 1684-49    | 10              | lung   | NT          | ST155     | H32       |
|      | 1684-52    | 10              | brain  | NT          | ST43      | NT        |
|      | 1832-43    | 24              | lung   | NT          | ST1196    | H31       |
|      | 2750-25    | 1               | spleen | NT          | ST117     | H97       |
|      | 2750-29    | 1               | spleen | NT          | ST295     | H38       |
|      | 2750-32    | 1               | heart  | NT          | ST117     | H97       |
|      | 2750-48    | 1               | lung   | NT          | ST10      | H866      |
| C    | 2750-49    | 1               | lung   | NT          | ST101     | H86       |
|      | 2835-26    | 5               | spleen | NT          | ST1485    | H58       |
|      | 2835-32    | 5               | heart  | NT          | ST295     | H38       |
|      | 2835-44    | 5               | lung   | NT          | ST295     | H38       |
|      | 2835-47    | 5               | lung   | NT          | ST2040    | H38       |
|      | 2835-57    | 5               | brain  | NT          | ST997     | H31       |
|      | 2863-46    | 10              | lung   | NT          | ST295     | H38       |
|      | 2863-50    | 10              | lung   | NT          | ST295     | H38       |
