# Supplementary material for: Genetic Diversity and Antimicrobial Resistance of Extraintestinal E. coli Populations Pre- and Post-Antimicrobial Therapy on Broilers Affected by Colisepticemia
Source: MDPI journal article supplement (doi:10.3390/ani13162590), 2023-08-11
Supplement: s1 [file s1]

**Table S1 – Statistics of the 31 newly sequenced whole genomes of *E. coli***

| Samples | First coverage | N° of contigs | N° of bp | MLST type | N 50   |
|---------|----------------|---------------|----------|-----------|--------|
| 871-21  | 84.9           | 248           | 5404654  | 117       | 108696 |
| 871-22  | 115.3          | 197           | 5210822  | 140       | 119872 |
| 871-41  | 129.1          | 282           | 5394093  | 117       | 76048  |
| 871-42  | 95.1           | 498           | 5400629  | 7080      | 78514  |
| 871-46  | 110.7          | 346           | 5036204  | 1618      | 54765  |
| 916-43  | 103.9          | 335           | 5020009  | 359       | 58277  |
| 976-38  | 96.3           | 770           | 5238046  | 43        | 41898  |
| 976-50  | 108.4          | 410           | 5152293  | 746       | 53531  |
| 976-57  | 118.5          | 99            | 5033925  | 117       | 174567 |
| 1614-21 | 73.1           | 271           | 4981152  | 23        | 72865  |
| 1614-23 | 93.3           | 163           | 4849691  | 23        | 109358 |
| 1614-35 | 110.8          | 207           | 4952965  | 23        | 139578 |
| 1614-41 | 103.4          | 198           | 5003675  | 23        | 102707 |
| 1665-22 | 103.5          | 476           | 5532331  | 7080      | 73626  |
| 1665-24 | 94.6           | 662           | 5533085  | 48        | 40182  |
| 1665-47 | 65.2           | 436           | 5227382  | 1196      | 38940  |
| 1684-49 | 93.9           | 327           | 5100617  | 155       | 59742  |
| 1684-52 | 136.3          | 609           | 5153625  | 43        | 54308  |
| 1832-43 | 86.6           | 413           | 5240210  | 1196      | 48379  |
| 2750-25 | 86.1           | 322           | 5127502  | 117       | 56562  |
| 2750-29 | 105.5          | 421           | 5305131  | 295       | 67276  |
| 2750-32 | 90.7           | 205           | 5097766  | 117       | 112051 |
| 2750-48 | 119.1          | 314           | 5228132  | 10        | 65030  |
| 2750-49 | 86.3           | 2062          | 6986556  | 101       | 21316  |
| 2835-26 | 104.1          | 271           | 5248241  | 1485      | 86166  |
| 2835-32 | 92.3           | 225           | 5238028  | 295       | 100534 |
| 2835-44 | 60.4           | 262           | 5128506  | 295       | 50108  |
| 2835-47 | 93.3           | 383           | 5020557  | 2040      | 42818  |
| 2835-57 | 94.2           | 340           | 5470555  | 997       | 97640  |
| 2863-46 | 54.3           | 569           | 5162506  | 295       | 23145  |
| 2863-50 | 89.5           | 358           | 5260718  | 295       | 55527  |
